# Supplementary material for: Magnetic hyperthermia induces effective and genuine immunogenic tumor cell death with respect to exogenous heating
Source: Royal Society of Chemistry journal article supplement (doi:10.1039/d2tb01004f), 2022-01-01
Supplement: d2tb01004f1.pdf [file d2tb01004f1.pdf]

**Magnetic hyperthermia induces effective and genuine immunogenic tumor cell death with respect to exogenous heating**

Bin Yan,<sup>#a</sup> Chen Liu,<sup>a</sup> Siyao Wang,<sup>a</sup> Hugang Li,<sup>a</sup> Ju Jiao,<sup>#b</sup> Wee Siang Vincent Lee,<sup>c</sup> Song Zhang,<sup>d</sup> Yayi Hou,<sup>e</sup> Yuzhu Hou,<sup>f</sup> Xiaowei Ma,<sup>g</sup> Haiming Fan,<sup>a</sup> Yi Lv,<sup>h</sup> and Xiaoli Liu<sup>\*a,h</sup>

<sup>a</sup> Laboratory of Resource Biology and Biotechnology in Western China, Ministry of Education; Provincial Key Laboratory of Biotechnology of Shaanxi Province, Northwest University, Xi'an, Shaanxi 710069, China

E-mail: [liuxiaoli@nwu.edu.cn](mailto:liuxiaoli@nwu.edu.cn)

<sup>b</sup> Department of Nuclear Medicine, The Third Affiliated Hospital of Sun Yat-sen University, 600 Tianhe Road, Guangzhou, Guangdong 510630, China

<sup>c</sup> Department of Materials Science and Engineering, National University of Singapore, 117573, Singapore

<sup>d</sup> College of Life Sciences, Nankai University, Tianjin 300071, China

<sup>e</sup> The State Key Laboratory of Pharmaceutical Biotechnology, Division of Immunology, Medical School; Jiangsu Key Laboratory of Molecular Medicine, Nanjing University, Nanjing, 210093, China

<sup>f</sup> Department of Pathogenic Microbiology and Immunology, School of Basic Medical Sciences, Xi'an Jiaotong University, Xi'an, Shaanxi 710061, China

<sup>g</sup> National Center for Veterinary Drug Safety Evaluation, College of Veterinary Medicine, China Agricultural University, Beijing 100193, China

<sup>h</sup> Institute of Regenerative and Reconstructive Medicine, Med-X Institute, First Affiliated Hospital of Xi'an Jiaotong University, Xi'an, Shaanxi 710049, China; National Local Joint Engineering Research Center for Precision Surgery & Regenerative Medicine, Shaanxi Provincial Center for Regenerative Medicine and Surgical Engineering, First Affiliated Hospital of Xi'an Jiaotong University, Xi'an, Shaanxi 710061, China

Correspondences:

Prof. Dr. X. L. Liu, [liuxiaoli@nwu.edu.cn](mailto:liuxiaoli@nwu.edu.cn)

# These authors contribute equally to this work.

## Preparation and characterization of FVIOs

Well-dispersed FVIOs were synthesized based on a previously reported method with slight modifications. The physical properties and magneto-responsive effects of FVIOs were studied. Ferrimagnetic vortex iron oxide nanorings (FVIOs) were fabricated beginning with the hydrothermal synthesis of  $\alpha$ - $\text{Fe}_2\text{O}_3$  nanorings followed by high-temperature solution-based reduction process to obtain  $\text{Fe}_3\text{O}_4$  crystalloid phase with ring-shape. Subsequently, phosphorylated mPEG2000 (abbreviated as p-mPEG) was conjugated onto  $\text{Fe}_3\text{O}_4$  nanorings to afford the water-dispersible. As-obtained  $\text{Fe}_3\text{O}_4$  nanorings are well-dispersed, presenting a light brown suspension. Scanning electronic microscopy (SEM) images revealed that as-obtained  $\text{Fe}_3\text{O}_4$  nanorings were ring morphology with an average outer diameter of  $\sim 50$  nm (Figure S1A). The X-ray diffraction (XRD) analysis of the as-prepared nanorings showed that all peaks could be indexed to cubic inverse spinal structured  $\text{Fe}_3\text{O}_4$  (JCPDS card, No. 19-0629) (Figure S1C). Fourier transform infrared (FT-IR) spectra were measured for unmodified FVIO, p-mPEG, and phosphorylated mPEG-FVIO (FVIO-PEG). As shown in Figure S1D, both unmodified FVIO and FVIO-PEG have a peak at  $575\text{ cm}^{-1}$ , and it could be attributed to the Fe-O bonds in  $\text{Fe}_3\text{O}_4$ . The corresponded peaks in P-mPEG were slightly shifted to 1408, 1277, 1089, and  $880\text{ cm}^{-1}$  for the FVIO-PEG, clearly indicating the formation of the presence of p-mPEG on the surface of FVIO.

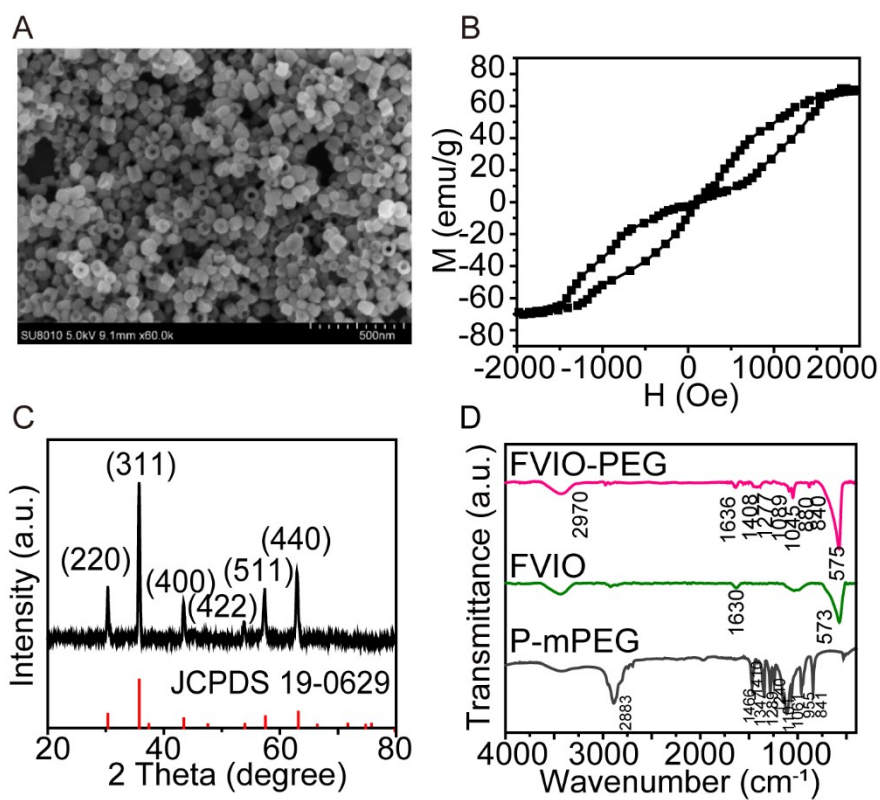

**Figure S1** (A) SEM image of FVIOs. (B) Magnetic hysteresis loops of FVIOs. (C) X-ray diffraction patterns of FVIOs. (D) FT-IR spectra of  $\text{Fe}_3\text{O}_4$  nanorings before ligand exchange, phosphorylated mPEG 2000 and FVIOs after ligand exchange.

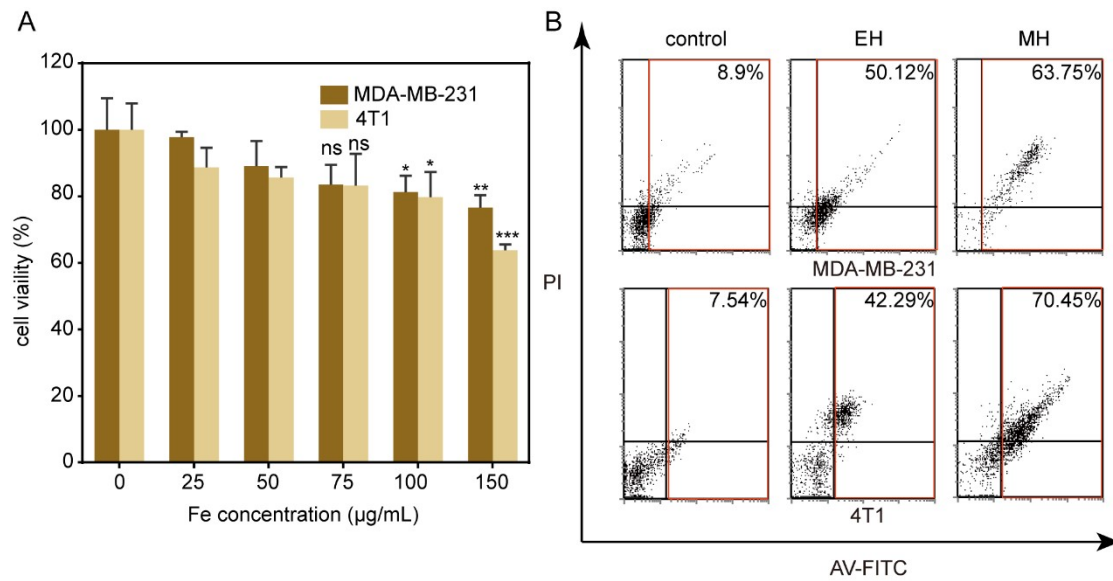

**Figure S2** (A) Cell viability of FVIOs. (B) Apoptosis following treatment with MH or water bath heating was measured, using PI/Annexin V labeling and flow cytometry analysis. Statistical analysis was conducted *via* one-way ANOVA with Tukey's multiple comparison tests. The experiments were performed three times independently. To be considered statistically significant, the p-value should be < 0.05. The range of p-values is indicated by the number of the label “\*”, that is, \*\*\*\*p < 0.0001.

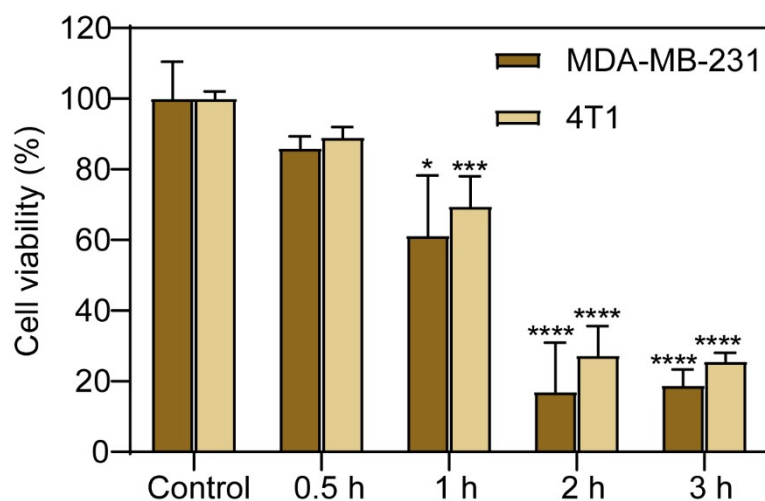

**Figure S3** Cell viability of water bath heating treated. Statistical analysis was conducted *via* one-way ANOVA with Tukey’s multiple comparison tests. The experiments were performed three times independently. To be considered statistically significant, the p-value should be < 0.05. The range of p-values is indicated by the number of the label “\*”, that is, \*p < 0.1; \*\*p < 0.01; \*\*\*p < 0.001; \*\*\*\*p < 0.0001. Both cells were exposed to water bath heating (43 °C) after incubation with FVIOs (75 µg/mL Fe) for different duration time (0.5 h, 1 h, 2 h, and 3 h), a time-dependent cytotoxicity was observed.

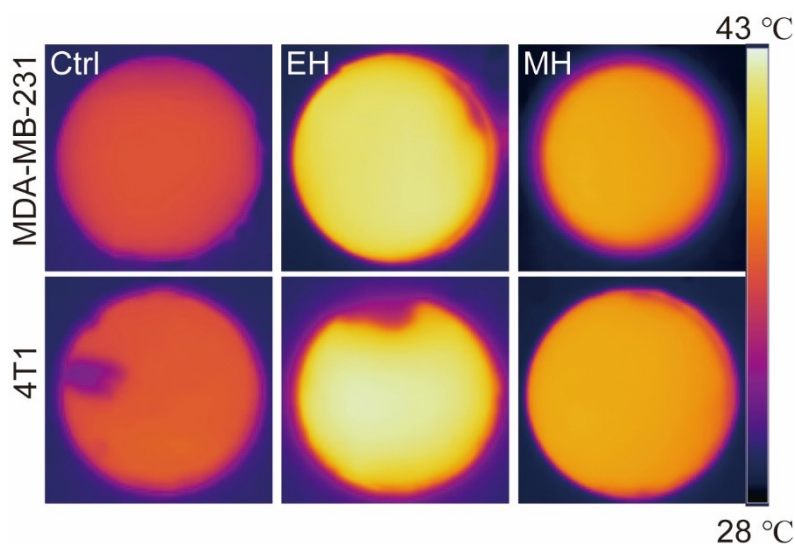

**Figure S4** Thermal images acquired by the IR camera of cells at different treatments.

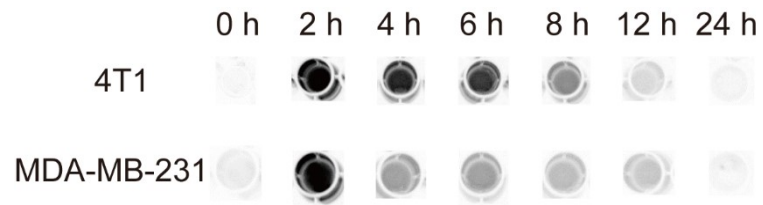

**Figure S5** Chemiluminescence images of ATP release after MH treatment.

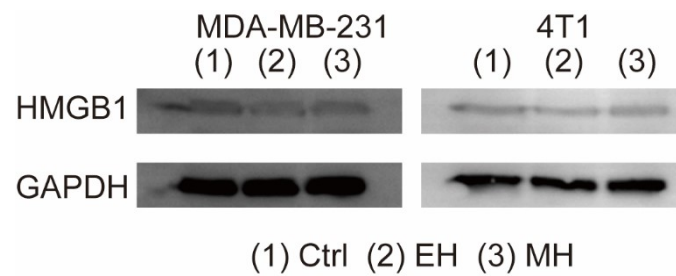

**Figure S6** Western blotting detection of HMGB1 expression levels in MDA-MB-231 and 4T1 cells after post-treatment.

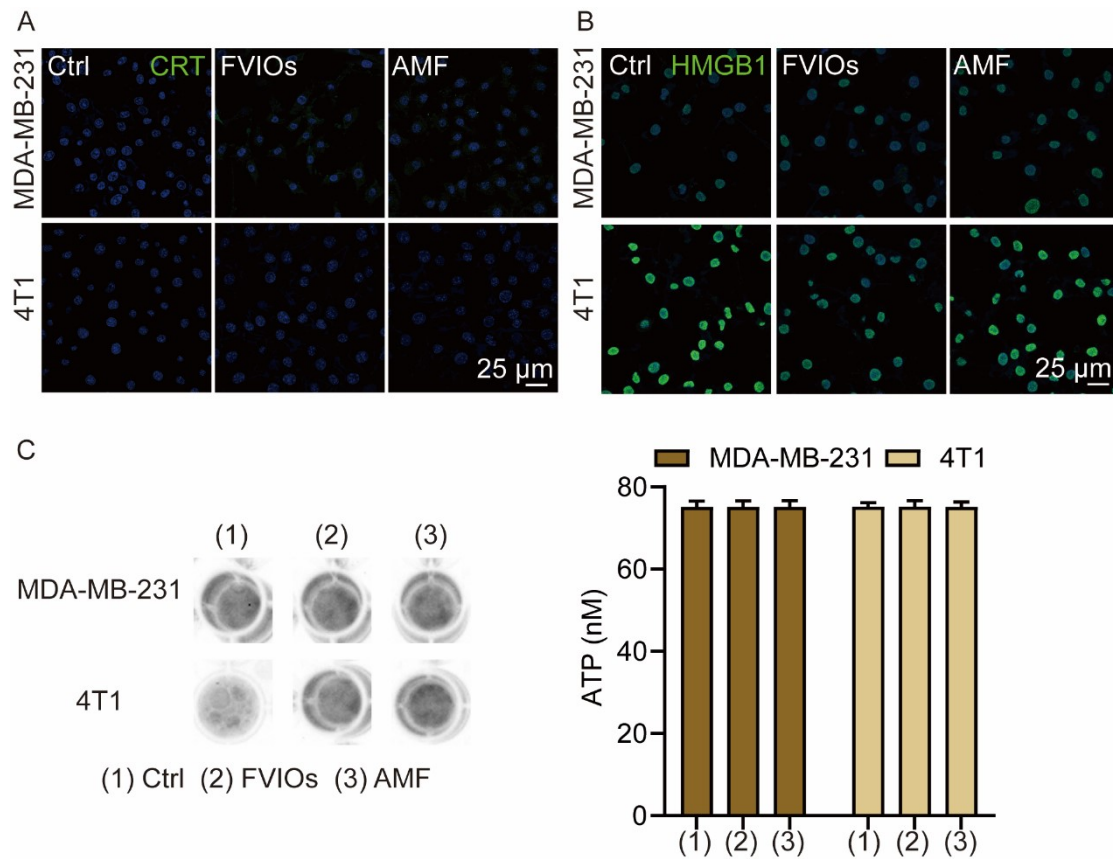

**Figure S7** (A) Confocal fluorescence images of both MDA-MB-231 and 4T1 cells after treatment with FVIOs or AMF alone. The cells were stained by CRT-FITC antibody (green) and DAPI (blue) before imaging. Scale bar: 25  $\mu$ m. (B) Confocal fluorescence images of both MDA-MB-231 and 4T1 cells after treatment with FVIOs or AMF alone. The cells were stained by HMGB1-FITC antibody (green) and DAPI (blue) before imaging. Scale bar: 25  $\mu$ m. (C) ATP secretions by post-treated MDA-MB-231 and 4T1 cells.

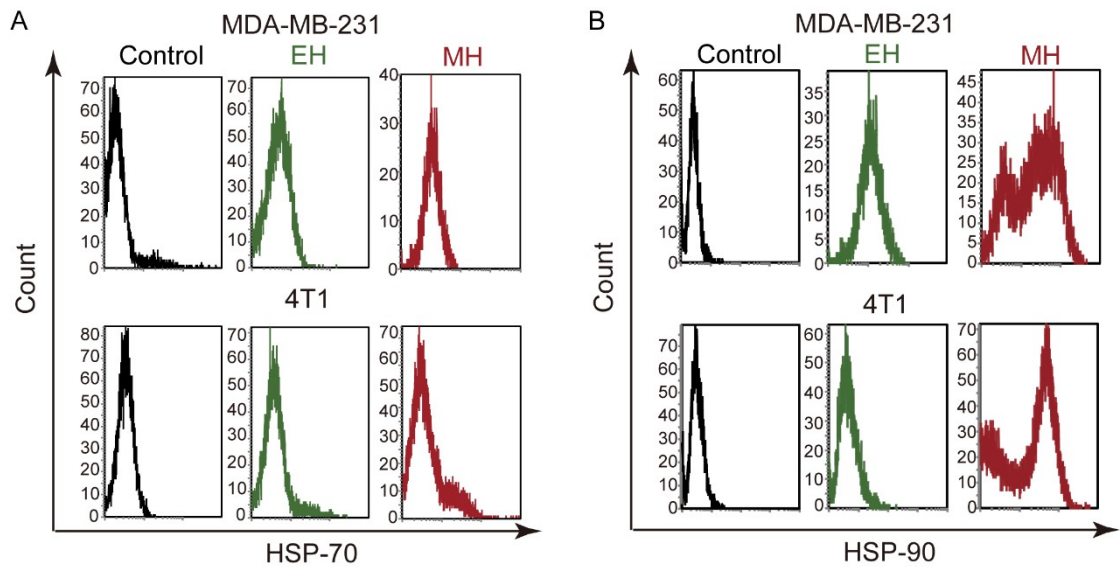

**Figure S8** HSP-70/90 release of post-MH or water bath heating treated detected by flow cytometry.

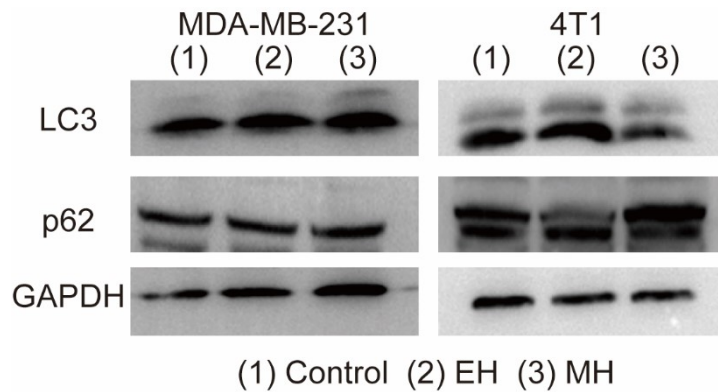

**Figure S9** Western blotting detection of LC2 and p62 expression levels in MDA-MB-231 and 4T1 cells after post-treatment.



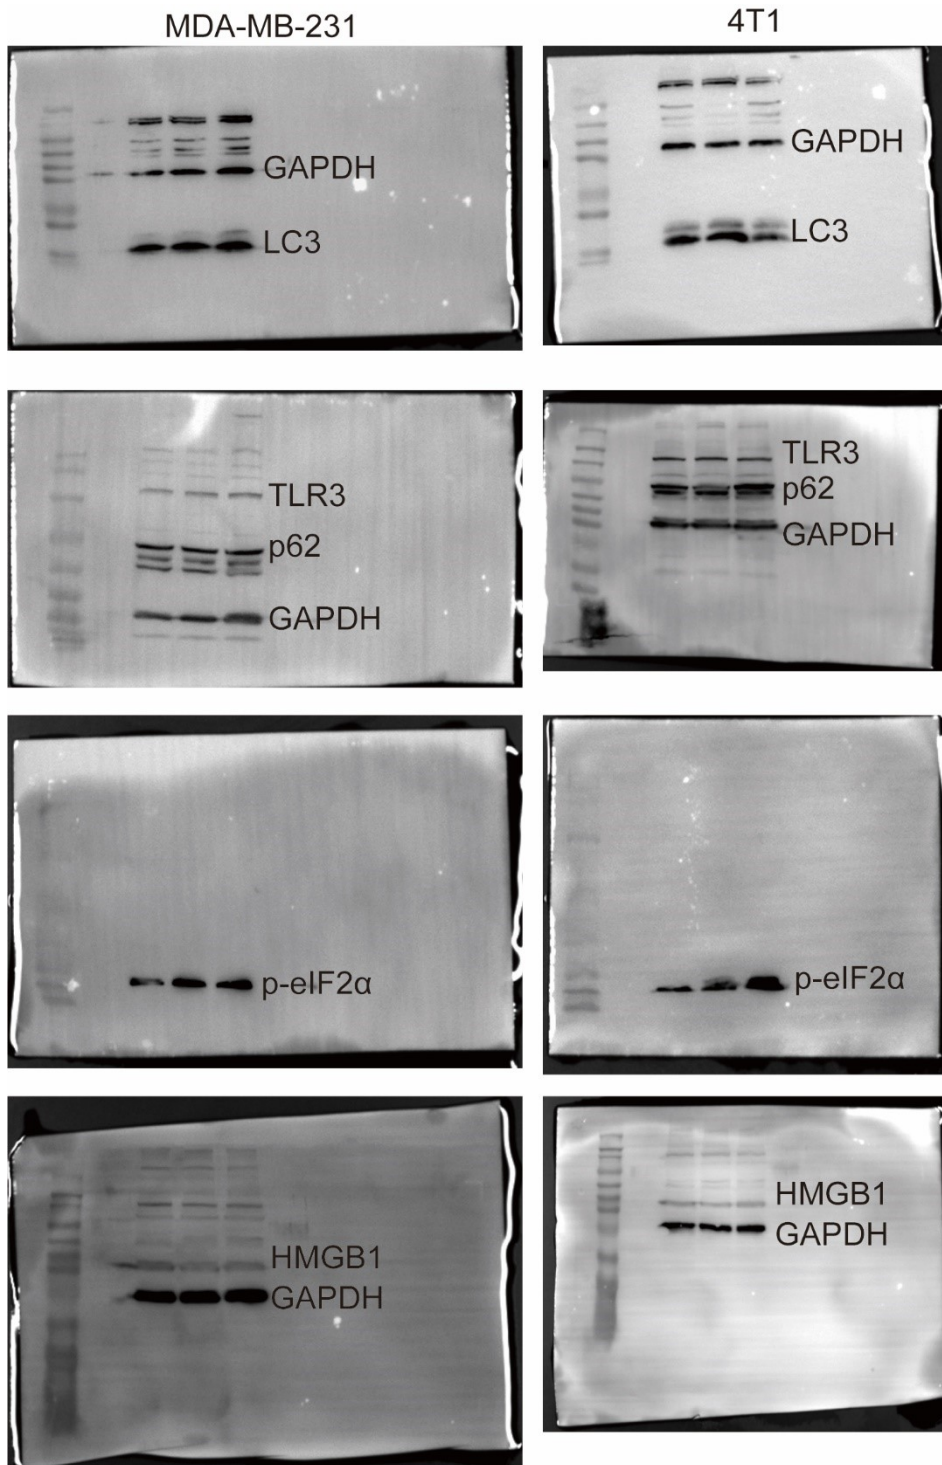

**Figure S10** Full uncropped and unprocessed Western Blot data with markers.

**Table S1 Characteristics of breast cancer patients in this study**

| Patients | Age | Type of tumor                                        | Grade |
|----------|-----|------------------------------------------------------|-------|
| 1        | 34  | Invasive ductal carcinoma with intraductal carcinoma | IIB   |
| 2        | 40  | Infiltrative ductal carcinoma                        | IIA   |
| 3        | 49  | Infiltrative ductal carcinoma                        | IIA   |
| 4        | 67  | Infiltrative ductal carcinoma                        | IIIA  |
| 5        | 33  | Infiltrative ductal carcinoma                        | IIB   |
| 6        | 72  | Infiltrative ductal carcinoma                        | IB    |
| 7        | 45  | Infiltrative ductal carcinoma                        | IIA   |
